# Supplementary material for: Petasin and Isopetasin Reduce CGRP Release from Trigeminal Afferents Indicating an Inhibitory Effect on TRPA1 and TRPV1 Receptor Channels
Source: Research Square preprint supplement (doi:10.21203/rs.3.rs-176595/v1), 2021-02-05
Supplement: Supplementary file 1 [file de8944381a0568c7347b6e51.docx]

# Tables
